# Supplementary material for: Diurnal variation of amplified canopy urban heat island in Beijing megacity during heat wave periods: Roles of mountain-valley circulation and urban morphology
Source: Copernicus journal article supplement (doi:10.5194/egusphere-2024-1200), 2024-05-14
Supplement: Supplementary file 1 [file egusphere-2024-1200-supplement.pdf]

# Diurnal variation of amplified canopy urban heat island in Beijing megacity during heat wave periods: Roles of mountain-valley circulation and urban morphology

Tao Shi<sup>1</sup>, Yuanjian Yang<sup>2\*</sup>, Ping Qi<sup>1</sup>, Simone Lolli<sup>3</sup>

<sup>1</sup>School of Mathematics and Computer Science, Tongling University, Tongling, 244000, China

<sup>2</sup>School of Atmospheric Physics, Nanjing University of Information Science and Technology, Nanjing, 210044, China

<sup>3</sup>CNR-IMAA, Contrada S. Loja, 85050 Tito Scalo (PZ), Italy

Correspondence to: Prof. Yuanjian Yang (yyj1985@nuist.edu.cn)

## Figures S1 and S2

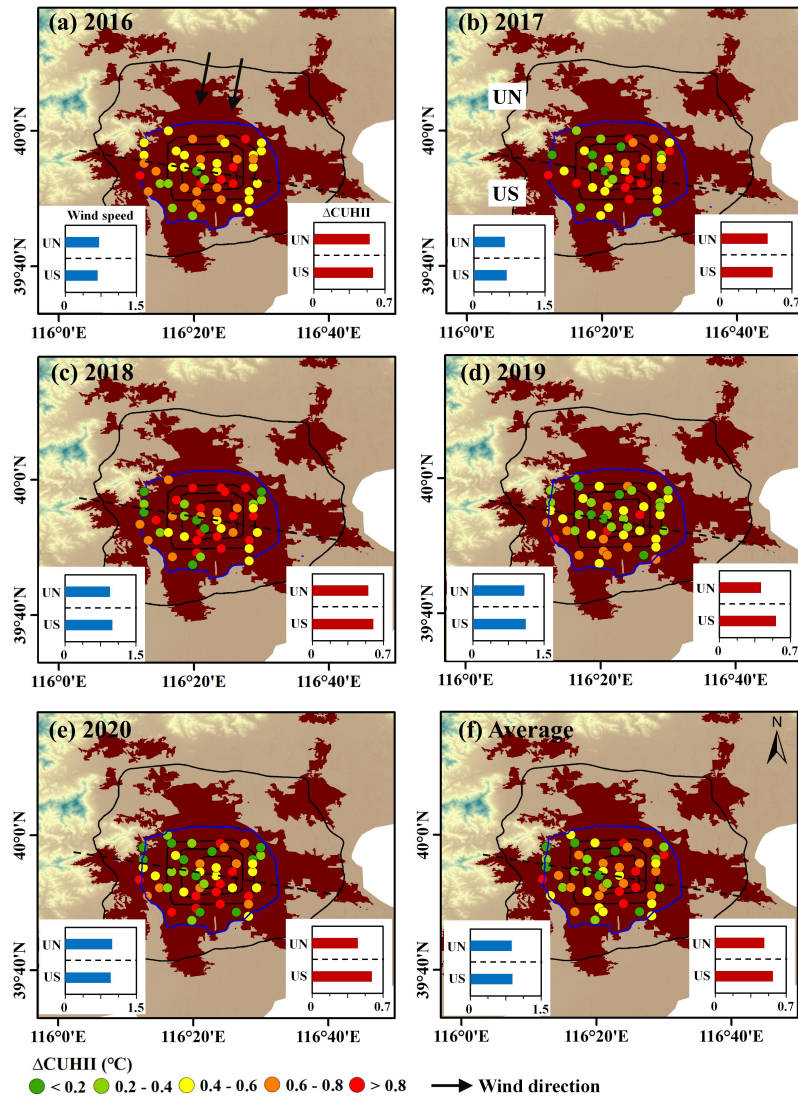

Figure: S1 During the mountain breeze phase, the spatial patterns of amplified CUHII during HW periods. (a)2016, (b)2017, (c)2018, (d)2019, (e)2020, (f)average value from 2016 to 2020.

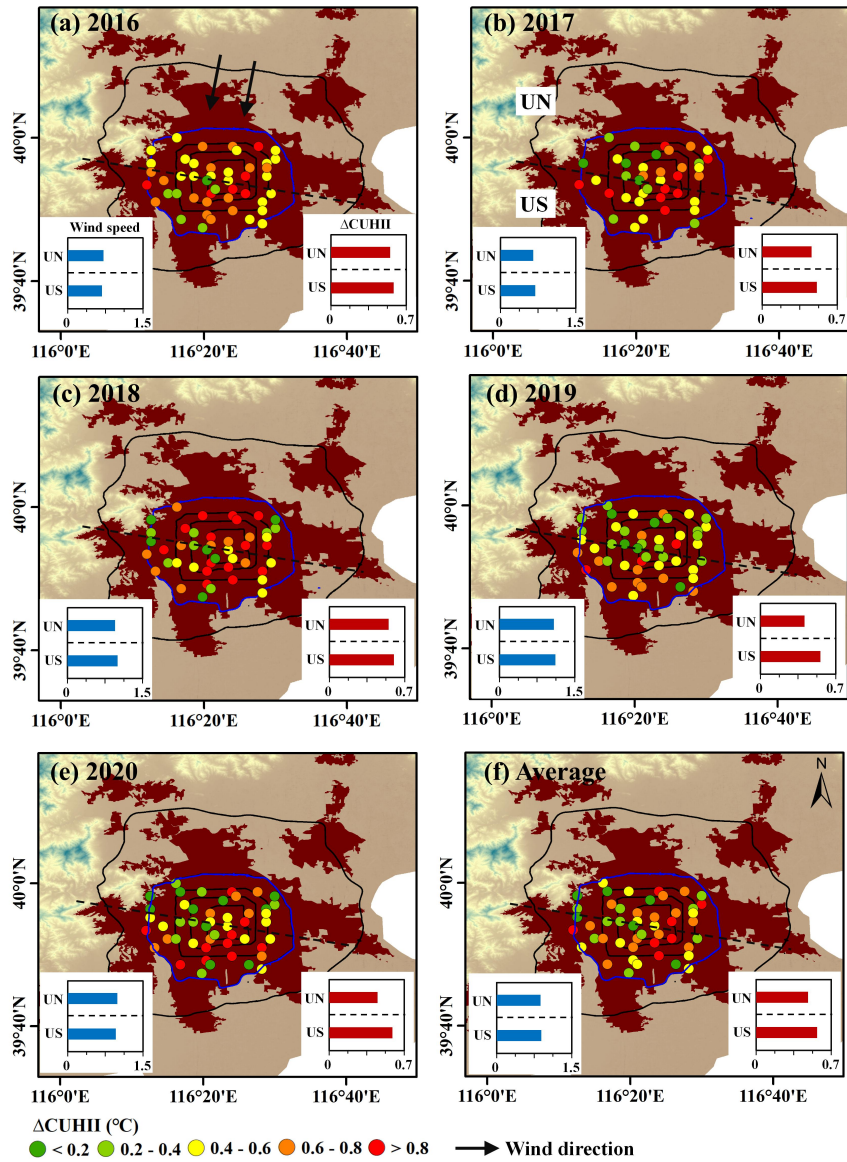

Figure: S2 During the valley breeze phase, the spatial patterns of amplified CUHII during HW periods. (a)2016, (b)2017, (c)2018, (d)2019, (e)2020, (f)average value from 2016 to 2020.
